# Supplementary material for: MET Exon 14 Skipping: A Case Study for the Detection of Genetic Variants in Cancer Driver Genes by Deep Learning
Source: MDPI journal article supplement (doi:10.3390/ijms22084217), 2021-04-19
Supplement: s1 [file s1]

## Supplementary data

### MET exon 14 skipping: a case study for the detection of genetic variants in cancer driver genes by deep learning.

Nosi V<sup>\*1</sup>, Alessandrì L<sup>\*1</sup>, Milan M<sup>2</sup>, Benvenuti S<sup>2</sup>, Cordero F<sup>3</sup>, Beccuti M<sup>3</sup>, Comoglio P<sup>2§</sup>, Calogero RA<sup>1#§</sup>

**Supplementary Figure 1S: MET $\Delta$ 14 false positive detected in corpus uteri.** a) WT MET from A549 RNAseq sample (33 million reads), 27152 reads mapping on MET locus, b) MET $\Delta$ 14 from NCI-H596 RNAseq sample (27 million reads), 24850 reads mapping on MET locus, c-f) False MET $\Delta$ 14 in corpus uteri samples, g) False MET $\Delta$ 14 in heart/mediastinum/pleura samples, h-l) False MET $\Delta$ 14 in kidney samples, m) False MET $\Delta$ 14 in skin samples.

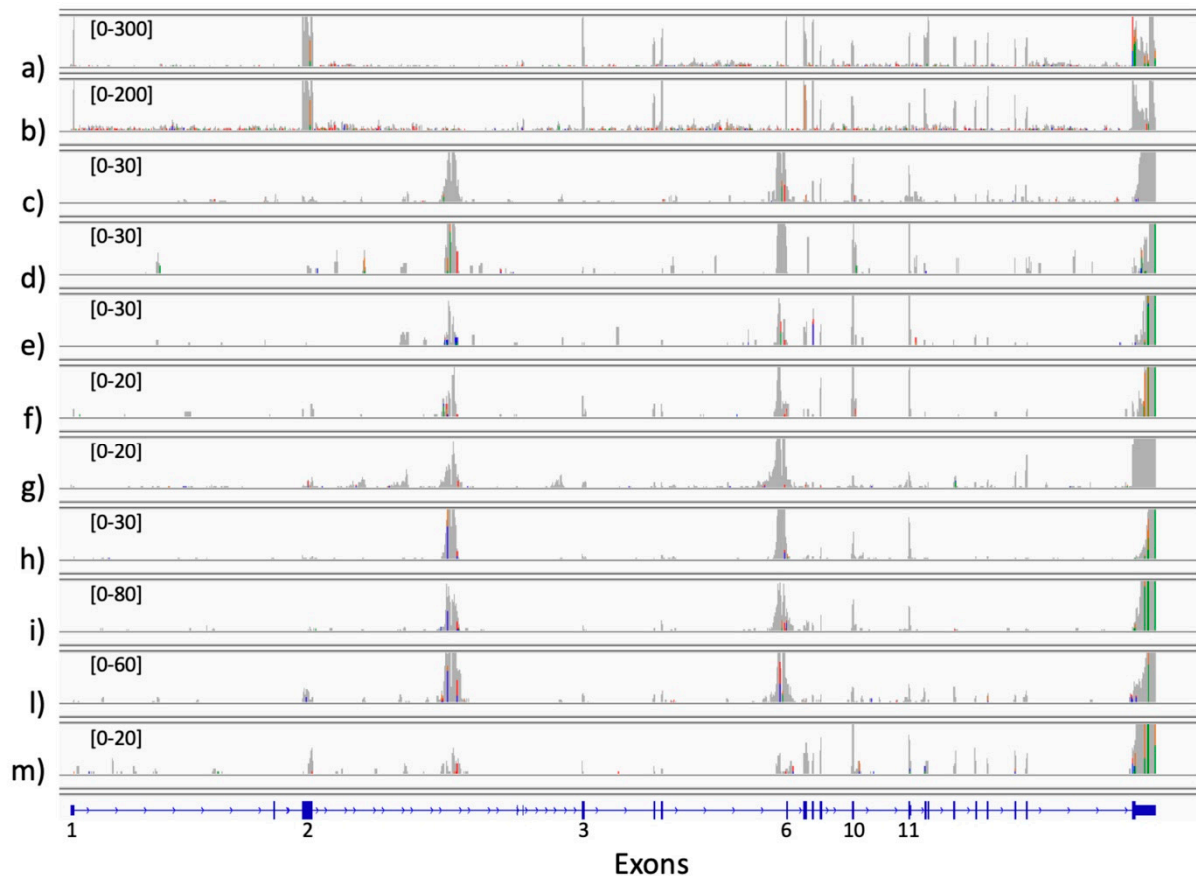

**Supplementary Table 1S:** Set of COSMIC census genes present in the ExonSkipDB. The first column is the set of genes associated to articles describing the presence of a skipping event in that gene linked to cancer.

| Symbol | PMID                                         |           |          |          |          | Symbol |         |         |          |         |  |
|--------|----------------------------------------------|-----------|----------|----------|----------|--------|---------|---------|----------|---------|--|
| ALK    | 28665006                                     | A1CF      | ASXL1    | BRD3     | CDK6     | CTNND1 | EML4    | F8XO11  | GPC3     | KIF5B   |  |
| APC    | 33670833                                     | ABL1      | ASXL2    | BRD4     | CEP89    | CTNND2 | EPAS1   | FCGR2B  | GPHN     | KIT     |  |
| BAP1   | 33681728                                     | ABL1      | ATF1     | BUB1B    | CHCHD7   | CUL3   | EPHA3   | FCRL4   | HERPUD1  | KMT2A   |  |
| BRCA1  | 32761968,32203205                            | ABL2      | ATIC     | CACNA1D  | CHD2     | CUX1   | EPS15   | FES     | HIF1A    | KMT2C   |  |
| BRCA2  | 29707112                                     | ACSL3     | ATM      | CALR     | CHD4     | DCTN1  | ERBB3   | FGFR1   | HIP1     | KMT2D   |  |
| BRIP1  | 30230034                                     | ACSL6     | ATP1A1   | CAMTA1   | CHIC2    | DDB2   | ERBB4   | FGFR10P | HMGA1    | KNSTRN  |  |
| BTK    | 12854903                                     | ACVR1     | ATP2B3   | CANT1    | CIC      | DDR2   | ERCC2   | FGFR2   | HMGA2    | KTNN1   |  |
| CDH1   | 26674321,33465060                            | ACVR2A    | ATR      | CARD11   | CLIP1    | DDX10  | ERG     | FGFR4   | HNRNP2B1 | LARP4B  |  |
| CHEK2  | 31349801                                     | AFF1      | ATRX     | CASP8    | CLTC     | DDX5   | ESR1    | FH      | HOOK3    | LASP1   |  |
| ERBB2  | 33214226                                     | AFF3      | AXIN1    | CASP9    | CLTCL1   | DDX6   | ETNK1   | FIP1L1  | HSP90AB1 | LATS2   |  |
| ETV6   | 30940639                                     | AFF4      | AXIN2    | CBFA2T3  | CNTRL    | DEK    | ETV1    | FLI1    | IDH2     | LCK     |  |
| EXT1   | 23629877                                     | AKT1      | BAX      | CBFB     | COL1A1   | DGCR8  | ETV4    | FLNA    | IGF2BP2  | LEF1    |  |
| EZH2   | 27090213                                     | AKT2      | BAZ1A    | CBLB     | COL3A1   | DNM2   | ETV5    | FLT3    | IKBKB    | LIFR    |  |
| GLI1   | 11032829                                     | ALDH2     | BCL11B   | CBLC     | CPEB3    | DNMT3A | EWSR1   | FLT4    | IKZF1    | LMNA    |  |
| JAK2   | 32826247,25617626                            | ANK1      | BCL2L12  | CCNE1    | CREB1    | DROSHA | EXT2    | FBNP1   | IL6ST    | LMO1    |  |
| MDM4   | 26595814                                     | AR        | BCL3     | CD209    | CREBBP   | EBF1   | EZR     | FOXPI   | IRF4     | LRIG3   |  |
|        | 33313283,30600919,30459450,33495574,3349775  |           |          |          |          |        |         |         |          |         |  |
|        | 8,33618059,33249657,31564914,30459450,336601 |           |          |          |          |        |         |         |          |         |  |
|        | 06,33641723,33638808,33667719,33643443,33533 | ARAF      | BCL6     | CD274    | CRNKL1   | ECT2L  | FAM131B | FSTL3   | ITGAV    | LRP1B   |  |
|        | 182,33545388,33540494                        |           |          |          |          |        |         |         |          |         |  |
| MLH1   | 28381181,19767099                            | ARHGAP26  | BCL9L    | CD28     | CRTC1    | EED    | FANCA   | FUBP1   | KAT7     | LZTR1   |  |
| MUTYH  | 20628285                                     | ARHGAP5   | BCLAF1   | CD74     | CRTC3    | EGFR   | FANCC   | FUS     | KDM5A    | MALT1   |  |
| NF2    | 10401006                                     | ARHGEF10L | BCOR     | CD79B    | CSF1R    | EIF1AX | FANCD2  | GAS7    | KDM5C    | MAP2K1  |  |
| NOTCH2 | 24574459                                     | ARHGEF12  | BCORL1   | CDCT3    | CSF3R    | EIF3E  | FANCG   | GMP5    | KDM6A    | MAP2K2  |  |
| PIK3R1 | 28561224                                     | ARID1A    | BCR      | CDH11    | CSMD3    | EIF4A2 | FAS     | GNAQ    | KDR      | MAP2K4  |  |
| PTCH1  | 30997576,27561271                            | ARID1B    | BIRC3    | CDH17    | CTCF     | ELF3   | FAT1    | GNAS    | KDSR     | MAP3K1  |  |
| SUFU   | 27840902                                     | ARID2     | BIRC6    | CDK12    | CTNNA2   | ELK4   | FAT4    | GOLGA5  | KEAP1    | MAP3K13 |  |
| TP53   | 16647569                                     | ARNT      | BMP5     | CDK4     | CTNNB1   | ELN    | FBLN2   | GOPC    | KIAA1549 | MAPK1   |  |
|        |                                              |           |          |          |          |        |         |         |          |         |  |
|        |                                              | MAX       | NCOR2    | PAX8     | PPP6C    | REL    | SH2B3   | STIL    | TRRAP    |         |  |
|        |                                              | MED12     | NDRG1    | PBRM1    | PRCC     | RET    | SH3GL1  | STRN    | TSC1     |         |  |
|        |                                              | MEN1      | NF1      | PCM1     | PRDM1    | RFWO3  | SIRPA   | SUZ12   | TSC2     |         |  |
|        |                                              | MITF      | NFATC2   | PDCD1LG2 | PRDM16   | RNF43  | SLC34A2 | SYK     | U2AF1    |         |  |
|        |                                              | MLF1      | NFE2L2   | PDE4DIP  | PRDM2    | ROBO2  | SLC45A3 | TBL1XR1 | UBR5     |         |  |
|        |                                              | MLLT1     | NFIB     | PDGFRA   | PREX2    | RPL10  | SMAD2   | TBX3    | USP6     |         |  |
|        |                                              | MLLT10    | NFKB2    | PDGFRB   | PRKACA   | RPL22  | SMAD3   | TCEA1   | USP8     |         |  |
|        |                                              | MLLT3     | NFKBIE   | PER1     | PRKCB    | RPL5   | SMARCA4 | TCF3    | VAV1     |         |  |
|        |                                              | MSH2      | NIN      | PHF6     | PRPF40B  | RPN1   | SMARCD1 | TCF7L2  | VTI1A    |         |  |
|        |                                              | MSI2      | NOTCH1   | PICALM   | PTK6     | RSPO2  | SMARCE1 | TEC     | WAS      |         |  |
|        |                                              | MSN       | NPM1     | PIK3CA   | PTPN13   | RUNX1  | SMC1A   | TERT    | WIF1     |         |  |
|        |                                              | MTOR      | NRG1     | PIK3CB   | PTPN6    | SBD5   | SMO     | TFEB    | WNK2     |         |  |
|        |                                              | MUC16     | NSD1     | PIM1     | PTPRB    | SDHA   | SND1    | TFG     | WRN      |         |  |
|        |                                              | MYB       | NT5C2    | PLCG1    | PTPRT    | SDHC   | SNX29   | TFRC    | XPC      |         |  |
|        |                                              | MYH11     | NTHL1    | PML      | QKI      | Sep-05 | SPECC1  | THRAPP3 | XPO1     |         |  |
|        |                                              | MYH9      | NTRK1    | PMS1     | RABEP1   | Sep-06 | SPEN    | TMPRSS2 | ZBTB16   |         |  |
|        |                                              | MYO5A     | NTRK3    | PMS2     | RAC1     | Sep-09 | SRC     | TNC     | ZEB1     |         |  |
|        |                                              | NAB2      | NUMA1    | POLD1    | RAD17    | SET    | SRGAP3  | TNFAIP3 | ZFHX3    |         |  |
|        |                                              | NACA      | NUP214   | POLE     | RAD21    | SETBP1 | SRSF3   | TP63    | ZMYM2    |         |  |
|        |                                              | NBEA      | NUP98    | POLG     | RAF1     | SETD1B | SS18    | TPM4    | ZMYM3    |         |  |
|        |                                              | NBN       | PABPC1   | POLQ     | RALGDS   | SETD2  | STAG1   | TPR     | ZNF384   |         |  |
|        |                                              | NCKIP5D   | PAFAH1B2 | POT1     | RANBP2   | SETDB1 | STAG2   | TRAF7   | ZNF521   |         |  |
|        |                                              | NCOA1     | PALB2    | PPFIBP1  | RAP1GDS1 | SF3B1  | STAT3   | TRIM24  | ZNRF3    |         |  |
|        |                                              | NCOA2     | PATZ1    | PPM1D    | RB1      | SFRP4  | STAT5B  | TRIM33  | ZRSR2    |         |  |
|        |                                              | NCOR1     | PAX5     | PPP2R1A  | RBM10    | SGK1   | STAT6   | TRIP11  |          |         |  |

**Supplementary Table 2S:** samples in TCGA bronchus and lung predicted as METΔ14 using different training configurations. METΔ14 score ≤ 0.1 predicts a skipped event. NN quality score ranges between 1 and 0, where 1 indicates an optimal NN performances.

| NN training                     | sample                               | METΔ14 score | NN quality score | MET reads | sample mapped reads | sample unmapped reads | skipping manual check |
|---------------------------------|--------------------------------------|--------------|------------------|-----------|---------------------|-----------------------|-----------------------|
| k-mer counts whole MET          | 4f7de6bd-55ea-43c3-a04a-1c57d647d4d3 | 0.001162738  | 0.9978775        | 34087     | 44562703.5          | 855013.5              | TRUE                  |
| k-mer counts whole MET          | 9b056fb3-407d-4adc-9720-25b9d3055be7 | 0.004646361  | 0.99833864       | 11391     | 78987772            | 1998091.5             | FALSE                 |
| k-mer counts whole MET          | ce9c0d52-542b-4586-99b0-4c409582e76d | 0.008714974  | 0.99846476       | 39918     | 124595862.5         | 2162904.5             | FALSE                 |
| k-mer counts whole MET          | 0f8f62da-daf0-4a59-9740-b03bd0e0ea3b | 0.008776099  | 0.9991946        | 5951      | 69446926.5          | 1678773               | FALSE                 |
| k-mer frequency exons 13-15 MET | c9032291-b671-4280-96d2-7a5806e66886 | 2.04E-05     | 0.6346185        | 59071     | 90868832            | 1714512               | TRUE                  |
| k-mer frequency exons 13-15 MET | 56b38e12-3495-4419-8df6-d3504b190357 | 0            | 0.7081907        | 44070     | 136788143           | 43362420              | TRUE                  |
| k-mer frequency exons 13-15 MET | 911fdcd9-3de5-493d-98c7-4567072ca1d5 | 1.84E-05     | 0.438411         | 34418     | 78565359            | 2271496               | TRUE                  |
| k-mer frequency exons 13-15 MET | 4f7de6bd-55ea-43c3-a04a-1c57d647d4d3 | 0.004308641  | 0.6003467        | 34087     | 44562703.5          | 855013.5              | TRUE                  |

|                                    |                                      |             |            |        |             |            |       |
|------------------------------------|--------------------------------------|-------------|------------|--------|-------------|------------|-------|
| k-mer frequency exons 13-15<br>MET | 92650f66-f8b3-49c8-a1fc-04fba0ffb6fe | 0           | 0.33768573 | 32307  | 60202242    | 1021761    | TRUE  |
| k-mer frequency exons 13-15<br>MET | 15750b18-0522-4186-8809-e7e3e7e4f6f7 | 0           | 0.42051643 | 28130  | 87516179.5  | 3472464.5  | TRUE  |
| k-mer frequency exons 13-15<br>MET | 9d5fde39-1fc9-4079-b095-bdc94bbb3679 | 2.98E-08    | 0.61794007 | 26170  | 60892059.5  | 1328162.5  | TRUE  |
| k-mer frequency exons 13-15<br>MET | 8cac0361-6973-4ae6-a34a-58f355085ec0 | 0.26194692  | 0.6702909  | 19455  | 59264871    | 2258010    | TRUE  |
| k-mer frequency exons 13-15<br>MET | eaf344c1-a5e8-4893-b17e-4a0dbb1bf2de | 1.17E-05    | 0.66456187 | 19083  | 41267020.5  | 752423     | TRUE  |
| k-mer frequency exons 13-15<br>MET | 7f841dfd-84db-4a14-8709-9831dba468dd | 0.007866561 | 0.4141181  | 213987 | 82285020.5  | 8009125    | FALSE |
| k-mer frequency exons 13-15<br>MET | 4500c5e4-665c-40f8-8cf2-c98b48b91b3  | 0           | 0.3985763  | 150600 | 55852402    | 3757212    | FALSE |
| k-mer frequency exons 13-15<br>MET | faf59a82-243a-49ea-bd8c-597fc39aaccf | 0           | 0.4208542  | 149532 | 51748284    | 821212     | FALSE |
| k-mer frequency exons 13-15<br>MET | a1905555-3d81-4446-b90b-e5d1d2519fc0 | 0.506146    | 0.47563305 | 132515 | 93308372.5  | 1975561.5  | FALSE |
| k-mer frequency exons 13-15<br>MET | c0c54d0d-21c5-4342-a718-7168e1f7c6f2 | 0           | 0.4733004  | 128205 | 78811903.5  | 1409834    | FALSE |
| k-mer frequency exons 13-15<br>MET | 3c4e102d-5c5b-4b90-84a0-67b8ee465103 | 0.10779613  | 0.5216947  | 92166  | 100329080.5 | 2104674    | FALSE |
| k-mer frequency exons 13-15<br>MET | 49b48e8f-6f90-4ebf-bacb-1c8f1c19fc27 | 0           | 0.42244694 | 66055  | 111587657   | 2849114    | FALSE |
| k-mer frequency exons 13-15<br>MET | 9ac13263-c20f-4530-bd4f-d20118d20db0 | 5.96E-08    | 0.4589822  | 66004  | 48535694    | 820903.5   | FALSE |
| k-mer frequency exons 13-15<br>MET | 3aa4bd0a-d550-45b0-943c-c8d60d30fef4 | 0           | 0.43359128 | 65061  | 91858435.5  | 1193531.5  | FALSE |
| k-mer frequency exons 13-15<br>MET | afb174de-1a55-4291-86cf-31149eea106d | 0.1952982   | 0.46828112 | 57896  | 77608179.5  | 1675932    | FALSE |
| k-mer frequency exons 13-15<br>MET | 1895e19e-becd-42df-89c8-d5b1dff12900 | 0.4330656   | 0.45584062 | 52073  | 104546884   | 1463551    | FALSE |
| k-mer frequency exons 13-15<br>MET | 1e0021fe-8d1e-4705-b668-d59082a19a0e | 0           | 0.41332984 | 51520  | 139597004.5 | 2247079    | FALSE |
| k-mer frequency exons 13-15<br>MET | d29989bb-7681-4820-b969-aada70bc39db | 0.026408255 | 0.7107893  | 49439  | 139471432.5 | 2267034    | FALSE |
| k-mer frequency exons 13-15<br>MET | 81d7e45-a5f4-436b-a416-c1f5bd0b7d7b  | 0.002586871 | 0.4817645  | 45915  | 40807001.5  | 798823     | FALSE |
| k-mer frequency exons 13-15<br>MET | c5da92a7-03e7-406a-ac2e-716c0a123f49 | 0.002166063 | 0.4245238  | 44497  | 64494538    | 1341246    | FALSE |
| k-mer frequency exons 13-15<br>MET | 2aa3ed71-57ec-44ec-a46f-2f91c414f065 | 3.07E-06    | 0.42654774 | 44295  | 133830180.5 | 10092829   | FALSE |
| k-mer frequency exons 13-15<br>MET | 77fb6dab-f570-4407-a8ba-3fb7b650733  | 0           | 0.44985628 | 42151  | 57488639    | 876582.5   | FALSE |
| k-mer frequency exons 13-15<br>MET | 16dfa0e8-e7cf-4589-bd99-82944d703695 | 0           | 0.41464037 | 41055  | 153319272   | 14320268.5 | FALSE |
| k-mer frequency exons 13-15<br>MET | 2ece65d6-95f0-4767-a61e-afea1d5c081f | 0           | 0.35185537 | 40783  | 90245553    | 1205305    | FALSE |
| k-mer frequency exons 13-15<br>MET | f76af440-35f6-44a7-9cb7-6ef05f2ccfc  | 1.04E-06    | 0.42843267 | 40302  | 139215769   | 2334288.5  | FALSE |
| k-mer frequency exons 13-15<br>MET | 3ae44dc0-6028-4507-9254-f4f25afe23e9 | 0           | 0.44031847 | 38643  | 36307762.5  | 728040.5   | FALSE |
| k-mer frequency exons 13-15<br>MET | ae2a91da-cf5e-44f6-98a7-68048b5cbe70 | 0           | 0.41499674 | 38308  | 71380872.5  | 1741235.5  | FALSE |
| k-mer frequency exons 13-15<br>MET | 88a8c964-9016-4d53-b7bc-19f643dbb9d5 | 5.07E-07    | 0.3430768  | 37085  | 120917506   | 6939020    | FALSE |
| k-mer frequency exons 13-15<br>MET | c49020ee-ccb5-4c6d-9f08-c557f6c9fe4  | 0           | 0.46568942 | 36830  | 100844566   | 1470598    | FALSE |
| k-mer frequency exons 13-15<br>MET | 54235af3-7abe-46ae-9304-f6b77283b612 | 0           | 0.3953657  | 34383  | 102992987.5 | 8705807    | FALSE |
| k-mer frequency exons 13-15<br>MET | d8a06aad-0658-4ecc-abcc-c5c598a3757e | 0           | 0.413293   | 34141  | 113664922.5 | 1602384.5  | FALSE |
| k-mer frequency exons 13-15<br>MET | 52c684a9-86af-452b-9270-2326e76297d4 | 0           | 0.46620095 | 31782  | 73043283    | 4216208.5  | FALSE |
| k-mer frequency exons 13-15<br>MET | 95960889-f586-4e92-88e1-3f38773eba65 | 0           | 0.39559016 | 31762  | 106277260.5 | 3042996.5  | FALSE |
| k-mer frequency exons 13-15<br>MET | 9a04f107-a775-46a3-853d-0d1f004464d8 | 0           | 0.37244126 | 31392  | 72216140.5  | 1405896    | FALSE |
| k-mer frequency exons 13-15<br>MET | fed45eec-0500-427c-8c46-df96610786e7 | 0.000868261 | 0.42000765 | 30536  | 58375861    | 1098778.5  | FALSE |
| k-mer frequency exons 13-15<br>MET | 72e9fed2-7c36-4ca3-a0c3-5f021bf94e67 | 0.021142334 | 0.45462963 | 29997  | 80357761.5  | 2330063    | FALSE |
| k-mer frequency exons 13-15<br>MET | 87fc72eb-6c02-4bcc-8b45-fb6de8fd15cf | 0           | 0.3471099  | 28588  | 56184822    | 839292.5   | FALSE |
| k-mer frequency exons 13-15<br>MET | a5435b7d-7365-46b9-a238-d1a1a8c1fd18 | 3.55E-05    | 0.43290186 | 28030  | 113577323   | 2224418.5  | FALSE |
| k-mer frequency exons 13-15<br>MET | f45c0334-854d-487b-994c-d17688f2341  | 0           | 0.37980986 | 27682  | 98862033    | 1155534    | FALSE |
| k-mer frequency exons 13-15<br>MET | fc2065f9-7e23-4a28-b084-b810d1a87009 | 4.77E-07    | 0.47523004 | 26875  | 84775792    | 2589971.5  | FALSE |
| k-mer frequency exons 13-15<br>MET | cb3524ce-ac32-4ac0-8244-2a36237a3b27 | 0.002302229 | 0.46727285 | 25658  | 93800839    | 4006990    | FALSE |
| k-mer frequency exons 13-15<br>MET | b9703fc4-4834-4f11-b316-278fe19a0b7f | 0           | 0.42219284 | 24979  | 99261176    | 2312882    | FALSE |
| k-mer frequency exons 13-15<br>MET | b170515e-38b9-4c78-b9f7-8d79a99c7ca8 | 0           | 0.44390014 | 24948  | 113872841.5 | 2027134.5  | FALSE |

|                                    |                                      |             |            |       |                 |           |       |
|------------------------------------|--------------------------------------|-------------|------------|-------|-----------------|-----------|-------|
| k-mer frequency exons 13-15<br>MET | e64c7950-36a9-43eb-999a-53d3e8e06f32 | 0           | 0.44836974 | 24832 | 114655664       | 2772213   | FALSE |
| k-mer frequency exons 13-15<br>MET | e1b6127d-6908-4b72-ab62-c57883f56800 | 0           | 0.41094878 | 24294 | 103168657.<br>5 | 6228618   | FALSE |
| k-mer frequency exons 13-15<br>MET | d89dd4a8-3573-434a-aa2e-000b662b2d77 | 0.000345886 | 0.44228142 | 24093 | 103782912.<br>5 | 4560812   | FALSE |
| k-mer frequency exons 13-15<br>MET | 8118b882-54d5-45fa-985b-dd0cf075d111 | 0           | 0.43454012 | 24038 | 89102483        | 2803429.5 | FALSE |
| k-mer frequency exons 13-15<br>MET | 3df91e6e-5a33-4f85-8ad3-b19257b847a8 | 0           | 0.37833697 | 23862 | 101491797       | 1451727.5 | FALSE |
| k-mer frequency exons 13-15<br>MET | 8c023b1f-d64f-410c-89ad-95537889ff2d | 0           | 0.41056025 | 23694 | 91770420        | 2425348.5 | FALSE |
| k-mer frequency exons 13-15<br>MET | 9e08eb7f-a831-437d-9146-714a0303b833 | 7.75E-07    | 0.4661902  | 23432 | 64254999        | 1659247.5 | FALSE |
| k-mer frequency exons 13-15<br>MET | b0ec29ac-ab53-4e5a-ae93-dd9ba28cbc4d | 0           | 0.7366078  | 23408 | 92255167        | 3485235   | FALSE |
| k-mer frequency exons 13-15<br>MET | dfff0629-41f9-449e-8ec5-0dae9c9018a1 | 1.03E-05    | 0.39416534 | 23135 | 131738863.<br>5 | 2978214.5 | FALSE |
| k-mer frequency exons 13-15<br>MET | 8b525cb8-15c0-4404-847e-7dcfd9e1cb3  | 0           | 0.39097697 | 22826 | 80110803        | 2846774.5 | FALSE |
| k-mer frequency exons 13-15<br>MET | f0a7639f-4215-42f9-9625-8c4887e9029a | 0.45235044  | 0.45030108 | 22307 | 97587933.5      | 3011049   | FALSE |
| k-mer frequency exons 13-15<br>MET | 5a11d7d0-8a47-4b18-8892-2188d56b8642 | 1.19E-06    | 0.7497631  | 21313 | 40848856        | 617674    | FALSE |
| k-mer frequency exons 13-15<br>MET | d037e7a7-4df8-4db5-99be-dc0f0b6d0d3a | 0           | 0.41706824 | 20970 | 126359609.<br>5 | 6007250.5 | FALSE |
| k-mer frequency exons 13-15<br>MET | 81e4f97e-6756-4173-9336-fc7801bd03c7 | 0           | 0.41236764 | 20814 | 128164018.<br>5 | 3168741.5 | FALSE |
| k-mer frequency exons 13-15<br>MET | 73e7a49e-87fd-4809-a076-1394a1a619a2 | 2.21E-06    | 0.3548656  | 20408 | 141553456.<br>5 | 5672381   | FALSE |
| k-mer frequency exons 13-15<br>MET | 0a420947-598b-47de-a254-93019042daef | 0           | 0.452678   | 20095 | 37813444        | 2850196.5 | FALSE |
| k-mer frequency exons 13-15<br>MET | f08a284a-681e-4a7b-bee0-508fbac55ff  | 0           | 0.45339435 | 20088 | 90466629.5      | 2107851   | FALSE |
| k-mer frequency exons 13-15<br>MET | c8ccca38-7660-45bf-8344-87a8e5b1287b | 0.006163925 | 0.4692268  | 20042 | 65443224        | 1534072.5 | FALSE |
| k-mer frequency exons 13-15<br>MET | 48faa87a-9523-4ce7-8e57-43080b3044f1 | 0           | 0.44731477 | 19304 | 60650862        | 815096.5  | FALSE |
| k-mer frequency exons 13-15<br>MET | 4f4ce53d-4b77-4266-93ba-3040e2b13468 | 0.000507951 | 0.4331196  | 19035 | 58742467        | 1158130   | FALSE |
| k-mer frequency exons 13-15<br>MET | d6cbd9fc-6e44-46cc-a263-e5321e6229e  | 0.008203536 | 0.40848738 | 18886 | 119049814       | 2079067.5 | FALSE |
| k-mer frequency exons 13-15<br>MET | 91b7daf7-dfeb-49df-a377-bdbf29a50543 | 0           | 0.43229455 | 18746 | 106811791       | 1416549   | FALSE |
| k-mer frequency exons 13-15<br>MET | 7e83b372-ba64-4212-84fd-0e307b030459 | 2.98E-08    | 0.4358817  | 18694 | 87982849        | 2188749.5 | FALSE |
| k-mer frequency exons 13-15<br>MET | 49205969-292e-49d1-a9a7-fcc8454488c8 | 0.005163103 | 0.43851304 | 18622 | 69797336.5      | 1120730.5 | FALSE |
| k-mer frequency exons 13-15<br>MET | 25a1f5c7-843b-4162-a4ee-11e283f60537 | 1.49E-07    | 0.44369146 | 18404 | 61594906        | 1678691   | FALSE |
| k-mer frequency exons 13-15<br>MET | ac05b23c-cd73-4f6a-81a8-79fdb182627a | 0           | 0.43756267 | 18359 | 82592394        | 1411256   | FALSE |
| k-mer frequency exons 13-15<br>MET | cbc79a08-97c9-4e4e-8a61-37d229765d31 | 0.007531226 | 0.38793322 | 18245 | 91690707.5      | 3621048.5 | FALSE |
| k-mer frequency exons 13-15<br>MET | ee076693-ee73-47cd-9f86-fcac5c3816db | 5.96E-08    | 0.4635978  | 18117 | 53645113.5      | 1221159.5 | FALSE |
| k-mer frequency exons 13-15<br>MET | 29aa71aa-3138-4f9c-8c25-b39cc26a416d | 0           | 0.42977247 | 18107 | 108902013.<br>5 | 2391606.5 | FALSE |
| k-mer frequency exons 13-15<br>MET | 7c661c1f-c92d-4917-8590-9b78428c8533 | 0.07932618  | 0.7292144  | 18090 | 46701333.5      | 1034884.5 | FALSE |
| k-mer frequency exons 13-15<br>MET | aa2fc42a-8f32-433c-ae8a-40e4840d9bfc | 0           | 0.43607333 | 18007 | 56023381.5      | 1643120   | FALSE |
| k-mer frequency exons 13-15<br>MET | 02b1cdfc-7435-41a2-942d-f29e97d2bc7f | 0           | 0.4211828  | 17609 | 116650531.<br>5 | 2174530.5 | FALSE |
| k-mer frequency exons 13-15<br>MET | 5477f6db-0aa5-431b-9eb8-40b7b1bd4788 | 0.044130176 | 0.46012035 | 16577 | 92938638        | 1329186   | FALSE |
| k-mer frequency exons 13-15<br>MET | f6115dfc-e6f5-44e8-be44-7723ac199bbb | 8.76E-06    | 0.44035006 | 16399 | 73036108        | 1194292.5 | FALSE |
| k-mer frequency exons 13-15<br>MET | 108d891c-7874-45f5-b90f-1b38c22cfe5c | 0           | 0.4509345  | 16099 | 97893193.5      | 1691953   | FALSE |
| k-mer frequency exons 13-15<br>MET | 7296a01f-877c-47ac-91d7-9a44723de8ed | 0.59611183  | 0.7819192  | 15823 | 118275931       | 3436981   | FALSE |
| k-mer frequency exons 13-15<br>MET | 058b3345-ecce-4056-95cc-450ba173dac9 | 0.06480482  | 0.43272218 | 15692 | 73887228        | 1909359.5 | FALSE |
| k-mer frequency exons 13-15<br>MET | 45bfe815-8049-4b5b-9a3d-4d6a72616d4d | 2.68E-07    | 0.45592317 | 15574 | 111969468.<br>5 | 2803178   | FALSE |
| k-mer frequency exons 13-15<br>MET | ee0793d3-5015-4cac-8db2-7124f2df42   | 0.16254914  | 0.7441665  | 14732 | 73674679.5      | 3423953   | FALSE |
| k-mer frequency exons 13-15<br>MET | e20bf59c-256c-4222-9040-386bc0e57a51 | 0           | 0.41168103 | 14617 | 84710355        | 2222307   | FALSE |
| k-mer frequency exons 13-15<br>MET | 35bb9c34-aace-48fd-9340-8458372d7be3 | 0           | 0.44106996 | 14556 | 89309517        | 4405411   | FALSE |
| k-mer frequency exons 13-15<br>MET | ad223f64-bd39-4050-a823-f7d663106a5b | 0           | 0.44475886 | 14424 | 86397083        | 1127419.5 | FALSE |
| k-mer frequency exons 13-15<br>MET | f6a0e02-a6c3-4632-935d-31074dc1b50b  | 1.08E-05    | 0.43211523 | 14369 | 86314073.5      | 1327849   | FALSE |

|                                    |                                      |             |            |       |             |           |       |
|------------------------------------|--------------------------------------|-------------|------------|-------|-------------|-----------|-------|
| k-mer frequency exons 13-15<br>MET | d566e8f1-7164-4440-974f-d8a0b29d9bc6 | 0           | 0.43402886 | 14072 | 123077732.5 | 2512388.5 | FALSE |
| k-mer frequency exons 13-15<br>MET | 56b91343-bd50-4ed9-a6a5-d2e069416e08 | 0.000516415 | 0.41572964 | 13719 | 70942734    | 1510199   | FALSE |
| k-mer frequency exons 13-15<br>MET | 3b29b654-2513-49f0-98d3-d7c266d8414e | 0           | 0.40619373 | 13643 | 97275991.5  | 2627013   | FALSE |
| k-mer frequency exons 13-15<br>MET | 27354ff8-6ac7-41c0-842b-f2470bd31d1d | 0.000889152 | 0.4113403  | 13420 | 107433989   | 2286760.5 | FALSE |
| k-mer frequency exons 13-15<br>MET | ac3494b7-32aa-455f-a9b0-d7a91589e556 | 0           | 0.37820816 | 12973 | 40578914    | 1182951.5 | FALSE |
| k-mer frequency exons 13-15<br>MET | 4cfb07bb-c8a1-4588-8f75-2b05566aa458 | 0           | 0.40203926 | 12665 | 73482011    | 2315607   | FALSE |
| k-mer frequency exons 13-15<br>MET | dfc8eb3c-312e-4535-980c-f5fd14c15b57 | 0           | 0.33102697 | 12146 | 80129698.5  | 902952.5  | FALSE |
| k-mer frequency exons 13-15<br>MET | 0d92d69a-541c-4775-b247-52d44ed8b187 | 0           | 0.4931284  | 12031 | 59218622    | 1221031.5 | FALSE |
| k-mer frequency exons 13-15<br>MET | 54531d92-cc37-47b9-acb4-588d0d66a27a | 0           | 0.39219725 | 11813 | 84808563.5  | 2005338.5 | FALSE |
| k-mer frequency exons 13-15<br>MET | d0eb4e19-8c96-494e-8d79-fe9b05afe076 | 0           | 0.40390953 | 11790 | 71605640.5  | 1538049   | FALSE |
| k-mer frequency exons 13-15<br>MET | ce4afab3-4ffe-4b88-ad56-5557df5e2139 | 0           | 0.39683476 | 11778 | 73729276    | 2234315   | FALSE |
| k-mer frequency exons 13-15<br>MET | 6283be9d-4077-4f2a-a523-f010196f5e4e | 0           | 0.4150509  | 11726 | 53941556    | 1398673.5 | FALSE |
| k-mer frequency exons 13-15<br>MET | 79becab4-a3b2-4035-8dc0-e8326a7b4a39 | 0           | 0.3816074  | 11507 | 47801573    | 884443.5  | FALSE |
| k-mer frequency exons 13-15<br>MET | 89c0aa10-be63-419e-9991-5db262c0fd81 | 3.87E-07    | 0.46010524 | 11417 | 40570310.5  | 849402.5  | FALSE |
| k-mer frequency exons 13-15<br>MET | 1f560ccd-e207-4e79-a3f4-ec9a956a8791 | 0           | 0.40607762 | 11382 | 55767096    | 2236742.5 | FALSE |
| k-mer frequency exons 13-15<br>MET | a3a72a59-d1b5-4d06-a8c5-65f4010fd0d4 | 0           | 0.4061726  | 11238 | 66958456    | 1541630   | FALSE |
| k-mer frequency exons 13-15<br>MET | 70a5549e-b93d-4440-8968-85a0826b3a29 | 0           | 0.38679016 | 11041 | 95942178.5  | 2348248.5 | FALSE |
| k-mer frequency exons 13-15<br>MET | 1990e1af-3fe6-4727-a324-9a86f04336bd | 1.88E-06    | 0.3449738  | 11009 | 76111677.5  | 1715189.5 | FALSE |
| k-mer frequency exons 13-15<br>MET | e5f5aa88-0b0e-4620-8ff4-3316ab3e9cd8 | 0           | 0.44548082 | 9960  | 85058681.5  | 1889305.5 | FALSE |
| k-mer frequency exons 13-15<br>MET | 9e9e6d41-ed67-4769-8afd-aa286b9c2d22 | 0           | 0.4452252  | 9794  | 58618155.5  | 850993    | FALSE |
| k-mer frequency exons 13-15<br>MET | 850dfca7-2aef-4f86-861a-020e59225848 | 8.94E-08    | 0.42548668 | 9582  | 35132484    | 865686    | FALSE |
| k-mer frequency exons 13-15<br>MET | 76a2fc4b-ec9d-434d-96bf-d142bb1cb881 | 0           | 0.38740957 | 9370  | 48906695.5  | 592712.5  | FALSE |
| k-mer frequency exons 13-15<br>MET | 97fc45d2-c025-4111-9925-0c1635a32171 | 0.006449163 | 0.4493788  | 9208  | 71927911    | 1918489.5 | FALSE |
| k-mer frequency exons 13-15<br>MET | f94a732c-b382-4584-8564-462500687c09 | 0           | 0.42518178 | 9163  | 77316732    | 1883638   | FALSE |
| k-mer frequency exons 13-15<br>MET | 301806f7-e592-4cc1-be8c-664a035a4551 | 1.24E-05    | 0.3532794  | 9116  | 44779810.5  | 662344.5  | FALSE |
| k-mer frequency exons 13-15<br>MET | 55646242-65cb-48b8-ae08-6ceb08fb33b7 | 4.35E-06    | 0.47437426 | 9014  | 61553245    | 1358515   | FALSE |
| k-mer frequency exons 13-15<br>MET | 4fa39f9c-6863-4186-959d-b060a7d9c581 | 0.47495693  | 0.46021995 | 9000  | 54675450.5  | 1270546.5 | FALSE |
| k-mer frequency exons 13-15<br>MET | ed63448c-0fa2-4377-9802-f10665d50766 | 0           | 0.4200727  | 8731  | 81942073    | 1946929.5 | FALSE |
| k-mer frequency exons 13-15<br>MET | 910d472c-1939-4bd3-b293-f02483c4b79  | 0           | 0.44806004 | 8013  | 45215374    | 732391    | FALSE |
| k-mer frequency exons 13-15<br>MET | 5bc08aec-828b-4038-a699-ea8b8645bc77 | 0           | 0.44790164 | 7773  | 77679589.5  | 4069888.5 | FALSE |
| k-mer frequency exons 13-15<br>MET | 73416b2f-f0ca-4af3-8abc-03010c9bec12 | 6.65E-05    | 0.38727385 | 7686  | 65520384    | 1193620   | FALSE |
| k-mer frequency exons 13-15<br>MET | 43ca912a-27ba-4b64-bf12-6a6beb464a86 | 0.001965314 | 0.4572315  | 7642  | 103534411.5 | 1613099.5 | FALSE |
| k-mer frequency exons 13-15<br>MET | 66b757f5-36d4-48d2-a37b-a522423126e7 | 0           | 0.49366984 | 7607  | 80591454    | 1949902   | FALSE |
| k-mer frequency exons 13-15<br>MET | fb3d40f2-16d8-408f-bd89-85969e0b80a1 | 0           | 0.40378413 | 7500  | 43359871.5  | 982661    | FALSE |
| k-mer frequency exons 13-15<br>MET | 3229ccfa-39b3-49b7-98a0-2d8ba1f07d8e | 8.34E-07    | 0.46533343 | 7439  | 94217722    | 1794210   | FALSE |
| k-mer frequency exons 13-15<br>MET | e11813c9-fb99-4320-aa8e-6d009e6abd2d | 3.01E-06    | 0.4774029  | 7423  | 80079489    | 1736638   | FALSE |
| k-mer frequency exons 13-15<br>MET | 7003b664-2b95-47f8-b0bd-d7c8cdd3c85c | 0.14872584  | 0.45120782 | 7415  | 140635884   | 4364378.5 | FALSE |
| k-mer frequency exons 13-15<br>MET | cbdbeb39-fd66-4ba8-a36d-8b00c68aee24 | 0.003278196 | 0.38209686 | 7250  | 54321171    | 711455    | FALSE |
| k-mer frequency exons 13-15<br>MET | a63ec3d0-6a36-42f0-a3b5-28d44893c043 | 0           | 0.42122582 | 7079  | 40665461.5  | 826640.5  | FALSE |
| k-mer frequency exons 13-15<br>MET | d7877f1b-2a43-468a-a890-9a4807a548fa | 0           | 0.422462   | 6845  | 43592304.5  | 992310.5  | FALSE |
| k-mer frequency exons 13-15<br>MET | 9792d25b-3830-4808-a47b-071eea851c71 | 9.27E-06    | 0.40607238 | 6505  | 52720404.5  | 945556.5  | FALSE |
| k-mer frequency exons 13-15<br>MET | e8c8e0d5-3b7a-4936-a06d-78fa1c9ebaf9 | 0           | 0.40873408 | 6440  | 39329781    | 761141.5  | FALSE |
| k-mer frequency exons 13-15<br>MET | bbb9c38e-6134-4107-8793-c5b734a8e207 | 0           | 0.49958205 | 6055  | 75668979.5  | 1310826.5 | FALSE |

|                                       |                                      |             |            |        |             |           |       |
|---------------------------------------|--------------------------------------|-------------|------------|--------|-------------|-----------|-------|
| k-mer frequency exons 13-15<br>MET    | 8d6896e4-4534-4026-84e2-decab7b0c561 | 0.000122696 | 0.5003371  | 6036   | 75726355.5  | 1830639.5 | FALSE |
| k-mer frequency exons 13-15<br>MET    | c977ad0a-d1ea-4c15-82b0-a1d8f9c24c02 | 0           | 0.32081473 | 5518   | 82875965    | 1156254.5 | FALSE |
| k-mer frequency exons 13-15<br>MET    | e6d1567b-49d5-428b-a3d7-cc82481ae1d8 | 0           | 0.37478673 | 5302   | 74718854.5  | 2951197.5 | FALSE |
| k-mer frequency exons 13-15<br>MET    | 31ef5b4c-de4c-4f3a-a2eb-a46ca5642bee | 0.00018838  | 0.3426908  | 5130   | 74906054    | 1824216   | FALSE |
| Coverage frequency exons 13-15<br>MET | 010a6f81-5601-4fd6-ad42-4d5670d48ff1 | 0           | 0.8507528  | 139031 | 86536796    | 1746345   | TRUE  |
| Coverage frequency exons 13-15<br>MET | 509b1e8b-8e1e-4d27-b9c7-a13942ae5dc9 | 0           | 0.8169447  | 127554 | 68401183    | 1726606   | TRUE  |
| Coverage frequency exons 13-15<br>MET | 654c93db-8b88-4619-ae04-e4c561133bc3 | 0           | 0.811287   | 114696 | 60171126    | 990399.5  | TRUE  |
| Coverage frequency exons 13-15<br>MET | be2ba5b6-5652-4daa-a29f-e4db98262008 | 0           | 0.8196091  | 58379  | 65644230.5  | 1644546   | TRUE  |
| Coverage frequency exons 13-15<br>MET | 56b38e12-3495-4419-8df6-d3504b190357 | 0           | 0.82740474 | 44070  | 136788143   | 43362420  | TRUE  |
| Coverage frequency exons 13-15<br>MET | 911fdcd9-3de5-493d-98c7-f567072ca1d5 | 0           | 0.80841327 | 34418  | 78565359    | 2271496   | TRUE  |
| Coverage frequency exons 13-15<br>MET | 4f7de6bd-55ea-43c3-a04a-1c57d647d4d3 | 0           | 0.7431444  | 34087  | 44562703.5  | 855013.5  | TRUE  |
| Coverage frequency exons 13-15<br>MET | 92650f66-f8b3-49c8-a1fc-04fba0ffb6fe | 0           | 0.8132071  | 32307  | 60202242    | 1021761   | TRUE  |
| Coverage frequency exons 13-15<br>MET | 5f7c9f6c-f894-4dce-98b0-a9d3a36392e8 | 0           | 0.8444487  | 28641  | 106888363.5 | 3169442.5 | TRUE  |
| Coverage frequency exons 13-15<br>MET | 15750b18-0522-4186-8809-e7e3e7e4f6f7 | 0           | 0.81890565 | 28130  | 87516179.5  | 3472464.5 | TRUE  |
| Coverage frequency exons 13-15<br>MET | 9d5fde39-1fc9-4079-b095-bdc94bbb3679 | 0           | 0.8005151  | 26170  | 60892059.5  | 1328162.5 | TRUE  |
| Coverage frequency exons 13-15<br>MET | 8cac0361-6973-4ae6-a34a-58f35085ec0  | 0           | 0.8241724  | 19455  | 59264871    | 2258010   | TRUE  |
| Coverage frequency exons 13-15<br>MET | eaf344c1-a5e8-4893-b17e-4a0dbb1bf2de | 0           | 0.81365246 | 19083  | 41267020.5  | 752423    | TRUE  |
| Coverage frequency exons 13-15<br>MET | c9032291-b671-4280-96d2-7a5806e66886 | 5.96E-08    | 0.8233008  | 59071  | 90868832    | 1714512   | TRUE  |
| Coverage frequency exons 13-15<br>MET | 2a7a996d-89ab-4717-831f-788461559037 | 3.51E-05    | 0.83253515 | 7560   | 43568960.5  | 563888    | TRUE  |
| Coverage frequency exons 13-15<br>MET | eeea8a1f-1967-4a88-8f3e-f746070d62b8 | 0.012374461 | 0.85565615 | 30093  | 126032419.5 | 3760419   | TRUE  |
| Coverage frequency exons 13-15<br>MET | e210c2a9-40c7-4ffe-9e5a-d6840c2e3a5c | 0.05090207  | 0.85936856 | 8684   | 35173297.5  | 507258.5  | TRUE  |
| Coverage frequency exons 13-15<br>MET | 9b056fb3-407d-4adc-9720-25b9d3055be7 | 0.02354762  | 0.819528   | 11391  | 78987772    | 1998091.5 | FALSE |

## Supplementary Table 3S: MET exons

>ENSG00000105976|1|MET

ATGAAGGCCCCGCTGTGCTTGACCTGGCATCCTCGTGCTCTGTTTACCTTGGTGCGAGAGGAGCAATGGGGAGTGTAAGAGGCCACTAGCAAAGTCCG  
AGATGAATGTGAATATGAAGTATCAGCTTCCCACTTACC CGCGGAAACCCATCCAGAATGTCATTCTACATGAGCATCACATTTTCCTTGGTGCCACTA  
ACTACATTTATGTTTTAAATGAGGAAGACCTTCAGAAGGTTGCTGAGTACAAGACTGGGCTGTGCTGGAACACCCAGATTGTTTCCCATGTCAGGACTGC  
AGCAGCAAAGCCAATTTATCAGGAGGTGTTTGAAAGATAACATCAACATGGCTCTAGTTGTCGACACCTACTATGATGATCAACTCATTAGCTGTGGCAG  
CGTCAACAGAGGGACCTGCCAGCGACATGTCTTTCCCAACAATCATACTGCTGACATACAGTCGGAGGTTCACTGCATATTCTCCCAACAGATAGAAGAGC  
CCAGCCAGTGCTCCTGACTGTGTGGTGAGCGCCCTGGGAGCCAAAGTCCTTTTCATCTGTAAAGGACCGGTTTCATCAACTCTTTGTAGGCAATACCATAAA  
TCTTCTTATTTTCCAGATCATCTCATTTCGATATCAGTGAGAAAGGCTAAAGGAAACGAAAGATGTTTTATGTTTTGACGGACCAAGTCCTACATTGAT  
GTTTTACCTGAGTTCAGAGATTTTACCCCATTAAGTATGTCCATGCCTTTGAAAGCAACAATTTTATTTACTTCTTGACGGTCCAAAGGGAAACTCTAGATG  
CTCAGACTTTTCACACAAGAATAATCAGGTTCTGTTCCATAAACTCTGGATTGCATTCTACATGGAAATGCCTCTGGAGTGATTCTCAGAGAAAAGAGAA  
AAAAGAGATCCACAAAGAAGGAAGTGTTTAATATACTTCAGGCTGCGTATGTCAGCAAGCCTGGGGCCAGCTTGCTAGACAAATAGGAGCCAGCCTGA  
ATGATGACATTTCTTTTCGGGGTGTTTCGCACAAAGCAAGCCAGATTCTGCCGAACCAATGGATCGATCTGCCATGTGTGCATTCCCTATCAAATATGTCAAC  
GACTTCTTCAACAAGATCGTCAACAAAAACAATGTGAGATGTCTCCAGCATTTTTACGGACCCCAATCATGAGCACTGCTTTAATAGG>ENSG00000105976

|1|MET  
GTAGGACCCTCCGAGCCAGGTGAGGGATATAATCTCGTGGTGCGCCGTTTTTAAAGCCGGTCCGAAAAGCGCAATATTCGGGTGGGAGTGACCCGATTTT  
CCAG>ENSG00000105976|1|MET

GCAGTTAAAGGTGAAGTGTTAAAGTTGGAAATAAGAGCTGTGAGAATATACACTTACATTCTGAAGCCGTTTTATGCACGGTCCCAATGACCTGCTGA  
AATTGAACAGCGAGCTAAATATAGAG>ENSG00000105976|1|MET  
GCAGGTGACCCGGAGGCCCTCGCCGCCCGCGCGCCCGAGCGCTTTGTGAGCAGATGCGGAGCCGAGTGAGGGGCGCGAGCCAGATGCGGGGCGAC  
AGCTGACTTGCTGAGAGGAGGCGGGAGGCGCGAGCGCGCTGTGGTCTTGCGCCGCTGACTTCTCCACTGTTCTCTGGGACCCGAAAG>ENSG000  
00105976|1|MET

AGACACGTGCTGGGGCGGGCAGGCGAGCGCCTCAGTCTGGTCGCCTGGCGGTGCCTCCGGCCCCAACGCGCCCGGGCCGCGGGGCCGCGCGCGC  
ATGCCCCGCTGAGTCACTGGCAGGGCAGCGCGCTGTGGAAAGGGCGGAGGGAGTGCGGCCGCGGGCGGGCGGGGCGCTGGGCTCAGCCCGGCC  
GCAGGTGACCCGGAGGCCCTCGCCGCCCGCGCGGCCCGAGCGCTTTGTGAGCAGATGCGGAGCCGAGTGAGGGGCGCGAGCCAGATGCGGGGCGAC  
AGCTGACTTGCTGAGAGGAGGCGGGAGGCGCGAGCGCGCTGTGGTCTTGCGCCGCTGACTTCTCCACTGTTCTCTGGGACCCGAAAG>ENSG000  
00105976|1|MET

GCTGTTAAATTGAAAATTGACTTAGCCAACCGAGAGACAAGCATCTTCAGTTACCGTGAAGATCCCATTGTCTATGAAATTCATCCAACCAATCTTTTATT  
AG>ENSG00000105976|1|MET

AGGTGACCCGGAGGCCCTCGCCGCCCGCGCGCCCGAGCGCTTTGTGAGCAGATGCGGAGCCGAGTGAGGGGCGCGAGCCAGATGCGGGGCGACAG  
CTGACTTGCTGAGAGGAGGCGGGAGGCGCGGAGCGCGCTGTGGTCTTGCGCCGCTGACTTCTCCACTGTTCTCTGGGACCCGAAAG>ENSG000001  
05976|2|MET

GCAGAAAATGTCTAGATTGGAGGTGAAGACCCTGGAGCCAGAGAGCCTAGGCTTAGTCTAGCCCTGCACTGAAG>ENSG00000105976|2|MET

GGTGGTGTAGTAAGAGTAAATCAAAGAGTTAGCAGAATGCTTCCCATATG>ENSG00000105976|2|MET  
ATAAACCTCTCATAATGAAGGCCCCCGCTGTGCTTGCACCTGGCATCCTCGTCTCTGTTACCTTGGTGCGAGAGGAGCAATGGGGAGTGTAAGAGGC  
ACTAGCAAAGTCCGAGATGAATGTGAATATGAAGTATCAGCTTCCCACTTACCAGCGGAAACACCCATCCAGAATGTCATTCTACATGAGCATCACATTT  
TCCTTGGTGCCACTAACTACATTTATGTTTTAAATGAGGAAGACCTTCAGAAGGTTGCTGAGTACAAGACTGGCCCTGTGCTGGAACACCCAGATTGTTTC  
CCATGTCAGGACTGCGAGCAGCAAAGCCAAATTTATCAGGAGGTGTTTGAAAGATAACATCAACATGGCTCTAGTTGTGCGACCTACTATGATGATCAACT  
CATTAGCTGTGGCAGCGTCAACAGAGGGACCTGCCAGCGACATGTCTTCCCAACAATCATACTGCTGACATACAGTCGGAGGTTCACTGCATATTCTCCC  
CACAGATAGAAGAGCCAGCCAGTGTCTGACTGTGTGGTGAGCGCCCTGGGAGCCAAAGTCTTTCATCTGTAAAGGACCAGTTCATCAACTTCTTTGTA  
GGCAATACCATAAATTTCTTCTATTTCCAGATCATCCATTGCATTCGATATCAGTGAGAAGGCTAAAGGAAACGAAAGATGGTTTTATGTTTTGACGGAC  
CAGTCTACATTGATGTTTTACCTGAGTTCAGAGATTCTTACCCCATTAAGTATGTCCATGCCTTTGAAAGCAACAATTTTATTTACTTCTTGACGGTCCAAA  
GGGAAACTCTAGATGCTCAGACTTTTACACAAGAATAATCAGGTTCTGTTCCATAAACTCGGATTGCATTCTACATGGAATGCCTGAGAGTGATTC  
TCACAGAAAAGAGAAAAAGAGATCCACAAGAAGGAAGTGTAAATATACTTCAGGCTGCGTATGTCAGCAAGCCTGGGGCCAGCTTGCTAGACAAA  
TAGGAGCCAGCCTGAATGATGACATTTCTTTCCGGGGTGTTCGCACAAGCAAGCCAGATTCTGCCGAACCAATGGATCGATCTGCCATGTGTGCATTCCT  
ATCAAATATGTCAACGACTTCTTCAACAAGATCGTCAACAAAAACAATGTGAGATGTCTCCAGCATTTTACGGACCCAATCATGAGCACTGCTTAAATAGG  
>ENSG00000105976|3|2|MET  
ACACTTCTGAGAAATTCATCAGGCTGTGAAGCGCGCCGTGATGAATATCGAACAGAGTTTACCACAGCTTTGCAGCGCGTTGACTTATTCATGGGTCAATT  
CAGCGAAGTCTCTTAACATCTATATCCACCTTCATTAAGGAGACCTACCATAGCTAATCTTGGGACATCAGAGGGTCGCTTCATGCAG>ENSG000001  
05976|3|MET  
ATAAACCTCTCATAATGAAGGCCCCCGCTGTGCTTGCACCTGGCATCCTCGTCTCTGTTACCTTGGTGCGAGAGGAGCAATGGGGAGTGTAAGAGGC  
ACTAGCAAAGTCCGAGATGAATGTGAATATGAAGTATCAGCTTCCCACTTACCAGCGGAAACACCCATCCAGAATGTCATTCTACATGAGCATCACATTT  
TCCTTGGTGCCACTAACTACATTTATGTTTTAAATGAGGAAGACCTTCAGAAGGTTGCTGAGTACAAGACTGGCCCTGTGCTGGAACACCCAGATTGTTTC  
CCATGTCAGGACTGCGAGCAGCAAAGCCAAATTTATCAGGAGGTGTTTGAAAGATAACATCAACATGGCTCTAGTTGTGCGACCTACTATGATGATCAACT  
CATTAGCTGTGGCAGCGTCAACAGAGGGACCTGCCAGCGACATGTCTTCCCAACAATCATACTGCTGACATACAGTCGGAGGTTCACTGCATATTCTCCC  
CACAGATAGAAGAGCCAGCCAGTGT>ENSG00000105976|3|MET  
ACACTTCTGAGAAATTCATCAGGCTGTGAAGCGCGCCGTGATGAATATCGAACAGAGTTTACCACAGCTTTGCAGCGCGTTGACTTATTCATGGGTCAATT  
CAGCGAAGTCTCTTAACATCTATATCCACCTTCATTAAGGAGACCTACCATAGCTAATCTTGGGACATCAGAGGGTCGCTTCATGCAG>ENSG000001  
05976|3|MET  
ATCAGTTTCTAATTCATCTCAGAACGGTTCATGCCGACAAGTGCAATATCCTCTGACAGACATGTCCCCATCCTAAGTAGTGGGGACTCTGATATATCCA  
GTCCATTACTGCAAAATACTGTCCACATTGACCTCAGTGCTCTAAATCCAGAGCTGGTCCAGGCAGTGCAGCATGTAGTGATTGGGCCCA>ENSG0000010  
5976|3|4|MET  
GTTGTGGTTTCTCGATCAGGACCATCAACCCCTCATGTGAATTTTCTCCTGGACTCCCATCCAGTGTCTCCAGAAGTGATTGTGGAGCATACATTAAACCAA  
AATGGCTACACACTGGTTATCACTGGGAAGAAG>ENSG00000105976|4|MET  
GGAAATGATATTGACCCTGAAGCAGTTAAAGGTGAAGTGTTAAAGGTTGGAAATAAGAGCTGTGAGAATATACACTTACATTCTGAAGCCGTTTTATGCA  
CGGTCCCCAATGACCTGTGAAATTGAACAGCGAGCTAAATATAGAGTGGGATTCTGCAATCCTCTCATGTGTAATAAGGAAGCCAGTGTAATTATG  
TTATTTCTCAGGCTTAAATAAATCATTAAAGCTCATTTATGTGTGGGTTTTGGCTCATCAACTC>ENSG00000105976|4|MET  
GTTGTGGTTTCTCGATCAGGACCATCAACCCCTCATGTGAATTTTCTCCTGGACTCCCATCCAGTGTCTCCAGAAGTGATTGTGGAGCATACATTAAACCAA  
AATGGCTACACACTGGTTATCACTGGGAAGAAG>ENSG00000105976|5|4|MET  
ATCACGAAGATCCCATTGAATGGCTGGGCTGCAGACATTTCCAGTCTGCAGTCAATGCCTCTCTGCCCCACCCTTTGTTCAAGTGTGGCTGGTGCCACGAC  
AAATGTGTGCGATCGGAGGAATGCCTGAGCGGGACATGGACTCAACAGATCTGTCTGCCTGCAATCTACAAG>ENSG00000105976|5|MET  
ATCACGAAGATCCCATTGAATGGCTGGGCTGCAGACATTTCCAGTCTGCAGTCAATGCCTCTCTGCCCCACCCTTTGTTCAAGTGTGGCTGGTGCCACGAC  
AAATGTGTGCGATCGGAGGAATGCCTGAGCGGGACATGGACTCAACAGATCTGTCTGCCTGCAATCTACAAG>ENSG00000105976|5|6|MET  
GTTTTCCAAATAGTGCAACCCCTGAAGGAGGGACAAGGCTGACCATATGTGGCTGGGACTTTGGATTTCGGAGGAATAATAAATTGATTAAAGAAAA  
CTAGAGTTTCTCCTTGAAATGAGAGCTGCACCTTGACTTTAAGTGAGAGCACGATGAATAC>ENSG00000105976|6|MET  
GTTTTCCAAATAGTGCAACCCCTGAAGGAGGGACAAGGCTGACCATATGTGGCTGGGAC>ENSG00000105976|7|6|MET  
ATTGAAATGCACAGTTGTCTCTGCCATGAATAAGCATTTCAATATGTCCATAATTATTTCAAATGGCCACGGGACAACACAATACAGTACATTCTCCTATGT  
G>ENSG00000105976|8|7|MET  
GATCCTGTAATAACAAGTATTTCCGCCGAATACGGTCTATGGCTGGTGGCACTTTACTTACTTTAACTGGAAATTACCTAAACAGTGGAATTCTAGACAC  
ATTTCAATTGGTGGAATAACATGTACTTTAAAAAG>ENSG00000105976|8|9|MET  
TGTGTCAAACAGTATTCTTGAATGTTATACCCAGCCCAACCATTTCAACTGAGTTTGCTGTTAAATTGAAATTGACTTAGCCAACCGAGAGACAAGCAT  
CTTCAGTTACCGTGAAGATCCCATTTGTCTATGAAATTCATCCAACCAATCTTTTATTAG>ENSG00000105976|9|MET  
GCATGTCAACATCGCTCTAATTCAGAGATAA>ENSG00000105976|10|MET  
TACTTGGTGGAAGAACCTCTCAACATTGTCAGTTTTCTATTTTGCTTTGCCAGTGGTGGGAGCACAATAACAGGTGTTGGGAAAAACCTGAATTCAGTTA  
GTGTCCCGAGAATGGTCATAAATGTGCATGAAGCAGGAAGGAACCTTACAGTG>ENSG00000105976|10|2|MET  
TGGTGGGAGCACAATAACAGGTGTTGGGAAAAACCTGAATTCAGTTAGTGTCCCGAGAATGGTCATAAATGTGCATGAAGCAGGAAGGAACCTTACAGT  
G>ENSG00000105976|11|3|MET  
GCATGTCAACATCGCTCTAATTCAGAGATAATCTGTTGTACCACTCCTTCCCTGCAACAGCTGAATCTGCAACTCCCCCTGAAAACCAAAGCCTTTTTCATGT  
TAGATGGGATCCTTTCCAAATCTTTGATCTCATTTATGTACATAATCCTGTGTTTAAAGCCTTTGAAAAGCCAGTGATGATCTCAATGGGCAATGAAATG  
TACTGGAAATTAAG>ENSG00000105976|12|MET  
GGAATGATATTGACCCTGAAGCAGTTAAAGGTGAAGTGTTAAAGGTTGGAAATAAGAGCTGTGAGAATATACACTTACATTCTGAAGCCGTTTTATGCA  
CGGTCCCCAATGACCTGTGAAATTGAACAGCGAGCTAAATATAGAG>ENSG00000105976|13|2|MET  
TGGGAAGCAAGCAATTTCTTCAACCGTCTTGGAAAAAGTAATAGTTCAACAGATCAGAATTTACAGGATTGATTGCTGGTGTGCTCAATATCAACAGC  
ACTGTTATTACTACTTGGGTTTTCTGTGGCTGAAAAAGAGAAAGCAATTAAG>ENSG00000105976|14|MET  
ATCTGGGCAGTGAATTAGTTCGCTACGATGCAAGAGTACACTCCTCATTTGGATAGGCTTGTAAGTGCCCGAAGTGAAGCCCACTACAGAAATGGT  
TTCAATGAACTCTGATAGACTACCGAGCTACTTTCCAGAAG>ENSG00000105976|15|MET  
ATCAGTTTCTAATTCATCTCAGAACGGTTCATGCCGACAAGTGCAATATCCTCTGACAGACATGTCCCCATCCTAAGTAGTGGGGACTCTGATATATCCA  
GTCCATTACTGCAAAATACTGTCCACATTGACCTCAGTGCTCTAAATCCAGAGCTGGTCCAGGCAGTGCAGCATGTAGTGATTGGGCCAGTAGCCTGATT  
GTGCAATTCATGAAGTCATAGGAAGAG>ENSG00000105976|16|MET  
GGCATTTTGGTTGTATATCATGGGACTTTGTTGGACAATGATGGCAAGAAAATTCCTGTGCTGTGAAATCCTTGAACA>ENSG00000105976|17|M  
ET  
GAATCACTGACATAGGAGAAGTTCCCAATTTCTGACCGAGGGAAATCATCATGAAAGATTTTAGTCATCCCAATGTCTCTCGCTCCTGGGAATCTGCCTGC  
GAAGTGAAGGGTCTCCGCTGGTGGTCTACCATACATGAAACATGGAGATCTCGAAATTTCAATCGAAATGAGACTCAT>ENSG00000105976|18|ME  
T

AATCCAACGTGTAAGATCTTATTGGCTTTGGTCTTCAAGTAGCCAAAGGCATGAAATATCTTGCAAGCAAAAAGTTTGCCACAGAGACTTGGCTGCAAG  
AAACTGTAT>ENS000000105976|19|MET  
GCTGGATGAAAAATTCACAGTCAAGGTTGGTCTGATTTTGGTCTTGCCAGAGACATGTATGATAAAGAATACTATAGTTACACAACAAAACAGGTGCAAAAG  
CTGCCAGTGAAGTGGATGGCTTTGGAAAAGCTGCAAACTCAAAAGTTTACCACCAAGTCAGATGTG>ENS000000105976|20|MET  
TGGTCTTTTGGCGTGCTCTCTGGGAGCTGATGACAAGAGGAGCCCCACCTTATCTGACGTAACACCTTTGATATAACTGTTTACTTGTGCAAGGGAG  
AAGACTCTACAACCCGAATACTGCCCAGACCCCTT>ENS000000105976|21|MET  
ATATGAAGTAATGCTAAAAATGCTGGCACCCCTAAAGCCGAAATGCGCCCATCCTTTTCTGAACTGGTGTCCCGGATATCAGCGATCTTCTCTACTTTCATTGG  
GGAGCACTATGTCCATGTGAACGCTACTTATGTGAACGTAAAAATGTGTCGCTCCGTATCCTTCTCTGTTGTATCAGAAAGATAACGCTGATGATGAGGTGG  
ACACACGACCAGCCTCCTTCTGGGAGACATCATAGTGTAGTACTATGTCAAAGCAACAGTCCACACTTTGTCCAATGGTTTTTCTACTGCCTGACCTTTAA  
AAGGCCATCGATATTCCTTTGCTCTTGCCAAAATTGCACTATTATAGGACTTGATTGTTATTTAAATTACTGGATTCTAAGGAATTTCTTATCTGACAGAGCA  
TCAGAACCAGAGGCTTGGTCCACAGGCCACGGACCAATGGCCTGCAGCCGTGACAACACTCCTGTCATATTGGAGTCCAAAACCTTGAATTCGGGTTGA  
ATTTTTTAAAAATCAGGTACCACTTGATTTTCATATGGGAAATTGAAGCAGGAAATATTGAGGGCTTCTTGATCACAGAAAACCTCAGAAGAGATAGTAATGC  
TCAGGACAGGAGCGGCAGCCCCAGAACAGGCCACTCATTTAGAATTCTAGTGTTTCAAAACACTTTTGTGTGTTGATGGTCAATAACATTTTTCTACTG  
ATGGTGTCACTTACCCATTAGGTAAACATTCCTTTTAAATGTTTGTGTTTTGAGACAGGATCTCACTCTGTTGCCAGGGCTGTAGTGCAGTGGTGTG  
ATCATAGTCACTGCAACCTCCACCTCCAGGCTCAAGCCTCCGAATAGCTGGGACTACAGGCGCACACCACCATCCCCGGCTAATTTTTGTATTTTTGT  
AGAGACGGGGTTTTGCCATGTTGCCAAGGCTGGTTTCAAACCTCTGGACTCAAGAAATCCACCCACCTCAGCCTCCAAAAGTGCTAGGATTACAGGCATG  
AGCCACTGCGCCAGCCCTTATAAATTTTTGTATAGACATTCTTTGGTGGGAAGAATATTTATAGGCAATACAGTCAAAGTTTCAAATAGCATCACACAA  
AACATGTTTATAAATGAACAGGATGTAATGTACATAGATGACATTAAGAAAATTTGTATGAAATAATTTAGTCATCATGAAATATTTAGTTGTATATAAAA  
ACCCACTGTTTGAGAATGATGCTACTCTGATCTAATGAATGTGAACATGTAGATGTTTTGTGTATTTTTTAAATGAAAACCTCAAAATAAGACAAGTAAT  
TTGTTGATAAATTTTTTAAAGATAAAGTCAAGCATGTTTGTAAAGCAGGATACATTTTACTAAAAGGTTTCAATCAGCTCATAGGTAGAGCA  
AGAAAAGGTTGGATGGATTGAAAAGATTAGCCTCTGTCTCGGTGGCAGGTTCCACCTCGCAAGCAATTGGAAACAAAACCTTTTGGGGAGTTTTATTTTGC  
ATTAGGTTGTGTTTTATGTTAAGCAAAACATACCTTTAGAAACAAATGAAAAAGGCAATTGAAAATCCAGCTATTTACCTAGATGGAATAGCCACCTGA  
GCAGAACCTTTGTGATGCTTCATTCTGTGGAATTTGTGCTTGCTACTGTATAGTGCATGTGGTGTAGGTTACTCTAAGTGGTTTTGTGCGACGTAACATTTA  
AAGTGTATATTTTTATAAAAAATGTTATTTTTAATGATATGAGAAAAATTTTGTAGGCCACAAAAACACTGCACTGTGAACATTTTAGAAAAGGTATGT  
CAGACTGGGATTAATGACAGCATGATTTTCAATGACTGTAAATTCGATGAAGAAATGTACTGATTGCCAATACACCCACCTCATTACATCATCAGGAC  
TTGAAGCCAAGGGTTAACCAGCAAGCTACAAAGAGGGTGTGTACACTGAAACTCAATAGTTGAGTTTGGCTGTTGTTGCAGGAAAATGATTATAACTA  
AAAGCTCTCTGATAGTGCAGAGACTTACCAGAAGACACAAGGAATTTGACTGAAGAGCTATTACAATCCAAATATTGCCGTTTTCATAAATGTAATAAGTAA  
TACTAATTCACAGAGTATTGTAATGGTGGATGACAAAAGAAAATCTGCTCTGTGGAAAGAAAGAACTGTCTCTACCAGGGTCAAGAGCATGAACGCATC  
AATAGAAAAGAACTCGGGGAAACATCCCATCAACAGGACTACACACTTGATATACATTTCTGAGAACACTGCAATGTGAAAATCACGTTTGCTATTTATAA  
ACTTGTCTTAGATTAATGTGTCTGGACAGATTGTGGGAGTAAGTGATTCTTCTAAGAAATAGATACTTGTCACTGCCTATACCTGCAGCTGAACTGAATGG  
TACTTCGATATGTTAATAGTTGTTCTGATAAATCATGCAATTAAGTAAGTGAATGCAACATCTTGTA>ENS000000105976|21|MET  
ATATGAAGTAATGCTAAAAATGCTGGCACCCCTAAAGCCGAAATGCGCCCATCCTTTTCTGAACTGGTGTCCCGGATATCAGCGATCTTCTCTACTTTCATTGG  
GGAGCACTATGTCCATGTGAACGCTACTTATGTGAACGTAAAAATGTGTCGCTCCGTATCCTTCTCTGTTGTATCAGAAAGATAACGCTGATGATGAGGTGG  
ACACACGACCAGCCTCCTTCTGGGAGACATCATAGTGTAGTACTATGTCAAAGCAACAGTCCACACTTTGTCCAATGGTTTTTCTACTGCCTGACCTTTAA  
AAGGCCATCGATATTCCTTTGCTCTTGCCAAAATTGCACTATTATAGGACTTGATTGTTATTTAAATTACTGGATTCTAAGGAATTTCTTATCTGACAGAGCA  
TCAGAACCAGAGGCTTGGTCCACAGGCCACGGACCAATGGCCTGCAGCCGTGACAACACTCCTGTCATATTGGAGTCCAAAACCTTGAATTCGGGTTGA  
ATTTTTTAAAAATCAGGTACCACTTGATTTTCATATGGGAAATTGAAGCAGGAAATATTGAGGGCTTCTTGATCACAGAAAACCTCAGAAGAGATAGTAATGC  
TCAGGACAGGAGCGGCAGCCCCAGAACAGGCCACTCATTTAGAATTCTAGTGTTTCAAAACACTTTTGTGTGTTGATGGTCAATAACATTTTTCTACTG  
ATGGTGTCACTTACCCATTAGGTAAACATTCCTTTTAAATGTTTGTGTTTTTGGAGACAGGATCTCACTCTGTTGCCAGGGCTGTAGTGCAGTGGTGTG  
ATCATAGTCACTGCAACCTCCACCTCCAGGCTCAAGCCTCCGAATAGCTGGGACTACAGGCGCACACCACCATCCCCGGCTAATTTTTGTATTTTTTGT  
AGAGACGGGGTTTTGCCATGTTGCCAAGGCTGGTTTTCAAACCTCTGGACTCAAGAAATCCACCCACCTCAGCCTCCAAAAGTGCTAGGATTACAGGCATG  
AGCCACTGCGCCAGCCCTTATAAATTTTTGTATAGACATTCTTTGGTGGGAAGAATATTTATAGGCAATACAGTCAAAGTTTCAAATAGCATCACACAA  
AACATGTTTATAAATGAACAGGATGTAATGTACATAGATGACATTAAGAAAATTTGTATGAAATAATTTAGTCATCATGAAATATTTAGTTGTATATAAAA  
ACCCACTGTTTGAGAATGATGCTACTCTGATCTAATGAATGTGAACATGTAGATGTTTTGTGTATTTTTTAAATGAAAACCTCAAAATAAGACAAGTAAT  
TTGTTGATAAATATTTTTAAAGATAAAGTCAAGCATGTTTGTAAAGCAGGATACATTTTACTAAAAGGTTTATTGGTTCCAATCACAGCTCATAGGTAGAGCAA  
AGAAAAGGTTGGATGGATTGAAAAGATTAGCCTCTGTCTCGGTGGCAGGTTCCACCTCGCAAGCAATTGGAAACAAAACCTTTTGGGGAGTTTTATTTTGC  
ATTAGGGTGTGTTTTATGTTAAGCAAAACATACCTTTAGAAACAAATGAAAAAGGCAATTGAAAATCCAGCTATTTACCTAGATGGAATAGCCACCTGA  
GCAGAACCTTTGTGATGCTTCATTCTGTGGAATTTGTGCTTGCTACTGTATAGTGCATGTGGTGTAGGTTACTCTAAGTGGTTTTGTGCGACGTAACATTTA  
AAGTGTATATTTTTATAAAAAATGTTATTTTTAATGATATGAGAAAAATTTTGTAGGCCACAAAAACACTGCACTGTGAACATTTTAGAAAAGGTATGT  
CAGACTGGGATTAATGACAGCATGATTTTCAATGACTGTAAATTCGATGAAGAAATGTACTGATTGCCAATACACCCACCTTATTACATCATCAGGAC  
TTGAAGCCAAGGGTTAACCAGCAAGCTACAAAGAGGGTGTGTACACTGAAACTCAATAGTTGAGTTTGGCTGTTGTTGCAGGAAAATGATTATAACTA  
AAAGCTCTCTGATAGTGCAGAGACTTACCAGAAGACACAAGGAATTGTACTGAAGAGCTATTACAATCCAAATATTGCCGTTTTCATAAATGTAATAAGTAA  
TACTAATTCACAGAGTATTGTAATGGTGGATGACAAAAGAAAATCTGCTCTGTGGAAAGAAAGAACTGTCTCTACCAGGGTCAAGAGCATGAACGCATC  
AATAGAAAAGAACTCGGGGAAACATCCCATCAACAGGACTACACACTTGATATACATTTCTGAGAACACTGCAATGTGAAAATCACGTTTGCTATTTATAA  
ACTTGTCTTAGATTAATGTGTCTGGACAGATTGTGGGAGTAAGTGATTCTTCTAAGAAATAGATACTTGTCACTGCCTATACCTGCAGCTGAACTGAATGG  
TACTTCGATGTTAATAGTTGTTCTGATAAATCATGCAATTAAGTAAGTGAATGATGCA

## Supplementary Table 4S: Samples characterized by unexpected coverage peak in intron 2.



| Tissue                   | Sample                               | # incorrectly paired MET reads | # MET reads paired with LINE1 sequence |
|--------------------------|--------------------------------------|--------------------------------|----------------------------------------|
| Cervix (uterus)          | 8f050c2c-c83b-4d26-8038-f3ca13e09ced | 121                            | 1                                      |
| Cervix (uterus)          | 14d39df5-73b7-40aa-9d77-efbaad8a23c5 | 8                              | 0                                      |
| Cervix (uterus)          | 4385ae24-fd72-491a-bfd0-484feacd5650 | 452                            | 3                                      |
| Cervix (uterus)          | 449380d4-f521-4d94-8923-811375f79bd7 | 163                            | 1                                      |
| Cervix (uterus)          | 5501872f-ee40-41f6-b22c-ada59e993b3e | 125                            | 3                                      |
| Cervix (uterus)          | c751ab77-8d6d-4b2b-9345-a3ba05bb259e | 158                            | 0                                      |
| Corpus (uterus)          | 39bb1145-0d48-4968-92ec-6c91484edc87 | 192                            | 6                                      |
| Corpus (uterus)          | 707cd6a3-b7de-47af-a317-5dca82014b1a | 77                             | 4                                      |
| Corpus (uterus)          | 815fc29e-72f6-493b-9ab6-c91c5f12a1a6 | 306                            | 4                                      |
| Corpus (uterus)          | c21a8f3c-584a-44d7-8902-3c73d4b09b99 | 0                              | 0                                      |
| Heart/Mediastinum/Pleura | 7f003fdd-09aa-4e42-a515-e2967c20b1e3 | 28                             | 1                                      |
| Kidney                   | 164e9f2a-c06f-444c-a27c-07585e0da7a7 | 120                            | 2                                      |
| Kidney                   | 947aaaf2-8073-4816-9877-04dcce0a1957 | 657                            | 4                                      |
| Kidney                   | 70502d21-3796-4041-82ef-7bb04dd28d11 | 31                             | 0                                      |
| Skin                     | 382dea5d-70fe-4a4f-b223-88264c9b3804 | 17                             | 0                                      |

**Supplementary Table 5S:** Samples characterized by the presence of a MET read(s) paired with a read mapping in LINE1 sequence.

| Tissue                   | Sample                               | position in MET locus | Location in MET locus |
|--------------------------|--------------------------------------|-----------------------|-----------------------|
| Kidney                   | 164e9f2a-c06f-444c-a27c-07585e0da7a7 | 116793365             | intron 19             |
| Kidney                   | 164e9f2a-c06f-444c-a27c-07585e0da7a7 | 116793365             | intron 19             |
| Corpus (uterus)          | 39bb1145-0d48-4968-92ec-6c91484edc87 | 116695965             | intron 1              |
| Corpus (uterus)          | 39bb1145-0d48-4968-92ec-6c91484edc87 | 116695967             | intron 1              |
| Corpus (uterus)          | 39bb1145-0d48-4968-92ec-6c91484edc87 | 116695967             | intron 1              |
| Corpus (uterus)          | 39bb1145-0d48-4968-92ec-6c91484edc87 | 116713208             | intron 2              |
| Corpus (uterus)          | 39bb1145-0d48-4968-92ec-6c91484edc87 | 116759968             | intron 10             |
| Corpus (uterus)          | 39bb1145-0d48-4968-92ec-6c91484edc87 | 116759968             | intron 10             |
| Cervix (uterus)          | 4385ae24-fd72-491a-bfd0-484feacd5650 | 116694835             | intron 1              |
| Cervix (uterus)          | 4385ae24-fd72-491a-bfd0-484feacd5650 | 116751947             | intron 5              |
| Cervix (uterus)          | 4385ae24-fd72-491a-bfd0-484feacd5650 | 116793744             | intron 19             |
| Cervix (uterus)          | 449380d4-f521-4d94-8923-811375f79bd7 | 116713208             | intron 2              |
| Cervix (uterus)          | 5501872f-ee40-41f6-b22c-ada59e993b3e | 116685410             | intron 1              |
| Cervix (uterus)          | 5501872f-ee40-41f6-b22c-ada59e993b3e | 116695967             | intron 1              |
| Cervix (uterus)          | 5501872f-ee40-41f6-b22c-ada59e993b3e | 116765089             | intron 11             |
| Corpus (uterus)          | 707cd6a3-b7de-47af-a317-5dca82014b1a | 116716185             | intron 2              |
| Corpus (uterus)          | 707cd6a3-b7de-47af-a317-5dca82014b1a | 116716189             | intron 2              |
| Corpus (uterus)          | 707cd6a3-b7de-47af-a317-5dca82014b1a | 116716189             | intron 2              |
| Corpus (uterus)          | 707cd6a3-b7de-47af-a317-5dca82014b1a | 116716189             | intron 2              |
| Heart/Mediastinum/Pleura | 7f003fdd-09aa-4e42-a515-e2967c20b1e3 | 116713208             | intron 2              |
| Corpus (uterus)          | 815fc29e-72f6-493b-9ab6-c91c5f12a1a6 | 116694778             | intron 1              |
| Corpus (uterus)          | 815fc29e-72f6-493b-9ab6-c91c5f12a1a6 | 116694778             | intron 1              |
| Corpus (uterus)          | 815fc29e-72f6-493b-9ab6-c91c5f12a1a6 | 116751826             | intron 5              |
| Corpus (uterus)          | 815fc29e-72f6-493b-9ab6-c91c5f12a1a6 | 116751827             | intron 5              |
| Cervix (uterus)          | 8f050c2c-c83b-4d26-8038-f3ca13e09ced | 116751954             | intron 5              |
| Kidney                   | 947aaaf2-8073-4816-9877-04dcce0a1957 | 116793487             | intron 19             |
| Kidney                   | 947aaaf2-8073-4816-9877-04dcce0a1957 | 116796727             | exon 21               |
| Kidney                   | 947aaaf2-8073-4816-9877-04dcce0a1957 | 116796727             | exon 21               |
| Kidney                   | 947aaaf2-8073-4816-9877-04dcce0a1957 | 116796808             | exon 21               |

**Supplementary Table 6S:** Samples in TCGA bronchus and lung predicted as MET $\Delta$ 14 using different training configurations. MET $\Delta$ 14 score  $\leq 0.1$  predicts a skipped event.

| CNN training   | sample                               | MET $\Delta$ 14 score | NN quality score | MET reads  | sample mapped reads | sample unmapped reads |
|----------------|--------------------------------------|-----------------------|------------------|------------|---------------------|-----------------------|
| 16 kmer counts | 0f862da-daf0-4a59-9740-b03bd0e0ea3b  | 0.00418618<br>3       | 5951             | 69446926.5 | 1678773             | FALSE                 |
| 16 kmer counts | 4f7de6bd-55ea-43c3-a04a-1c57d647d4d3 | 0.00627973<br>7       | 34087            | 44562703.5 | 855013.5            | TRUE                  |
| 16 kmer counts | 7dde9229-a172-466f-b4f5-12508fb3938a | 0.05498245<br>4       | 17090            | 113470656  | 2020366             | FALSE                 |
| 16 kmer counts | 9b056fb3-407d-4adc-9720-25b9d3055be7 | 0.00534912<br>9       | 11391            | 78987772   | 1998091.5           | FALSE                 |
| 16 kmer counts | b7818aa6-af2b-4eda-967f-3db7b30749fb | 0.02618235<br>3       | 12301            | 96460534.5 | 4762668             | FALSE                 |

|                                     |                                      |                 |        |             |           |       |
|-------------------------------------|--------------------------------------|-----------------|--------|-------------|-----------|-------|
| 16 kmer counts                      | c18f5c1b-4597-4e56-ad21-bafd975fd94e | 0.05905375      | 12301  | 96460534.5  | 4762668   | FALSE |
| 16 kmer counts                      | ce9c0d52-542b-4586-99b0-4c409582e76d | 0.01120424<br>3 | 39918  | 124595862.5 | 2162904.5 | FALSE |
| 16 kmer counts                      | d34a6605-5d94-4fea-a455-7e9e70495953 | 0.01319333<br>9 | 39918  | 124595862.5 | 2162904.5 | FALSE |
| 16 kmer counts                      | e6d1567b-49d5-428b-a3d7-cc82d81ae1d8 | 0.05399158<br>6 | 5302   | 74718854.5  | 2951197.5 | FALSE |
| 16 kmer counts                      | ffe03e7-ce56-408e-a6d6-2357f597da28  | 0.09233853      | 24691  | 51135944.5  | 830894    | FALSE |
| 13-15 MET k-mer<br>counts frequency | 92650f66-f8b3-49c8-a1fc-04fba0ffb6fe | 1.32024E-<br>05 | 32307  | 60202242    | 1021761   | TRUE  |
| 13-15 MET k-mer<br>counts frequency | 4f7de6bd-55ea-43c3-a04a-1c57d647d4d3 | 1.46925E-<br>05 | 34087  | 44562703.5  | 855013.5  | TRUE  |
| 13-15 MET k-mer<br>counts frequency | 15750b18-0522-4186-8809-e7e3e7e4f6f7 | 1.67191E-<br>05 | 28130  | 87516179.5  | 3472464.5 | TRUE  |
| 13-15 MET k-mer<br>counts frequency | eaf344c1-a5e8-4893-b17e-4a0dbb1bf2de | 1.75536E-<br>05 | 19083  | 41267020.5  | 752423    | TRUE  |
| 13-15 MET k-mer<br>counts frequency | 56b38e12-3495-4419-8df6-d3504b190357 | 1.92225E-<br>05 | 44070  | 136788143   | 43362420  | TRUE  |
| 13-15 MET k-mer<br>counts frequency | 654c93db-8b88-4619-ae04-e4c561133bc3 | 2.13683E-<br>05 | 114696 | 60171126    | 990399.5  | TRUE  |
| 13-15 MET k-mer<br>counts frequency | 509b1e8b-8e1e-4d27-b9c7-a13942ae5dc9 | 2.97427E-<br>05 | 127554 | 68401183    | 1726606   | TRUE  |
| 13-15 MET k-mer<br>counts frequency | be2ba5b6-5652-4daa-a29f-e4db98262008 | 6.41346E-<br>05 | 58379  | 65644230.5  | 1644546   | TRUE  |
| 13-15 MET k-mer<br>counts frequency | 911fdc9d-3de5-493d-98c7-f567072ca1d5 | 7.41184E-<br>05 | 34418  | 78565359    | 2271496   | TRUE  |
| 13-15 MET k-mer<br>counts frequency | 8cac0361-6973-4ae6-a34a-58f355085ec0 | 0.00010722<br>9 | 19455  | 59264871    | 2258010   | TRUE  |
| 13-15 MET k-mer<br>counts frequency | 9d5fde39-1fc9-4079-b095-bd-c94bb3679 | 0.00015133<br>6 | 26170  | 60892059.5  | 1328162.5 | TRUE  |
| 13-15 MET k-mer<br>counts frequency | 5f7c9fc6-f894-4dce-98b0-a9d3a36392e8 | 0.00133398<br>2 | 28641  | 106888363.5 | 3169442.5 | TRUE  |
| 13-15 MET k-mer<br>counts frequency | 010a6f81-5601-4fd6-ad42-4d5670d48ff1 | 0.00780254<br>6 | 139031 | 86536796    | 1746345   | TRUE  |
| 13-15 MET k-mer<br>counts frequency | 2a7a996d-89ab-4717-831f-788461559037 | 0.01415127<br>5 | 7560   | 43568960.5  | 563888    | TRUE  |
| 13-15 MET k-mer<br>counts frequency | c9032291-b671-4280-96d2-7a5806e66886 | 0.04142213      | 59071  | 90868832    | 1714512   | TRUE  |
| 13-15 MET k-mer<br>counts frequency | e210c2a9-40c7-4f6e-9e5a-d6840c2e3a5c | 0.0564214       | 8684   | 35173297.5  | 507258.5  | TRUE  |
| 13-15 MET<br>coverage<br>frequency  | 4f7de6bd-55ea-43c3-a04a-1c57d647d4d3 | 0.06403863<br>4 | 34087  | 44562703.5  | 855013.5  | TRUE  |
| 13-15 MET<br>coverage<br>frequency  | 56b38e12-3495-4419-8df6-d3504b190357 | 0.07843056      | 44070  | 136788143   | 43362420  | TRUE  |
| 13-15 MET<br>coverage<br>frequency  | 15750b18-0522-4186-8809-e7e3e7e4f6f7 | 0.07858249<br>5 | 28130  | 87516179.5  | 3472464.5 | TRUE  |
| 13-15 MET<br>coverage<br>frequency  | 92650f66-f8b3-49c8-a1fc-04fba0ffb6fe | 0.08228013      | 32307  | 60202242    | 1021761   | TRUE  |
| 13-15 MET<br>coverage<br>frequency  | 654c93db-8b88-4619-ae04-e4c561133bc3 | 0.0826129       | 114696 | 60171126    | 990399.5  | TRUE  |
| 13-15 MET<br>coverage<br>frequency  | eaf344c1-a5e8-4893-b17e-4a0dbb1bf2de | 0.08437839      | 19083  | 41267020.5  | 752423    | TRUE  |
| 13-15 MET<br>coverage<br>frequency  | 509b1e8b-8e1e-4d27-b9c7-a13942ae5dc9 | 0.09332588      | 127554 | 68401183    | 1726606   | TRUE  |
| 13-15 MET<br>coverage<br>frequency  | be2ba5b6-5652-4daa-a29f-e4db98262008 | 0.09363499      | 58379  | 65644230.5  | 1644546   | TRUE  |
